# Supplementary material for: Genome-wide Identification, Evolution and Expression Analysis of Basic Helix-loop-helix (bHLH) Gene Family in Barley (Hordeum vulgare L.)
Source: PubMed Central journal article supplement — Curr Genomics. 2020 Dec;21(8):621–44. doi: 10.2174/1389202921999201102165537 (PMC7770637; doi:10.2174/1389202921999201102165537), 2020-12
Supplement: CG-21-624_SD1.pdf [file CG-21-624_SD1.pdf]

## Supplementary Material

### Genome-wide Identification, Evolution and Expression Analysis of Basic Helix-loop-helix (bHLH) Gene Family in Barley (*Hordeum vulgare L.*)

Qinglin Ke<sup>1,#</sup>, Wenjing Tao<sup>1,#</sup>, Tingting Li<sup>1</sup>, Wenqiu Pan<sup>2</sup>, Xiaoyun Chen<sup>1</sup>, Xiaoyu Wu<sup>1</sup>, Xiaojun Nie<sup>2</sup> and Licao Cui<sup>1,2,\*</sup>

<sup>1</sup>College of Bioscience and Engineering, Jiangxi Agricultural University, Nanchang 330045, Jiangxi, China; <sup>2</sup>State Key Laboratory of Crop Stress Biology in Arid Areas and College of Agronomy, Northwest A&F University, Yangling 712100, Shaanxi, China

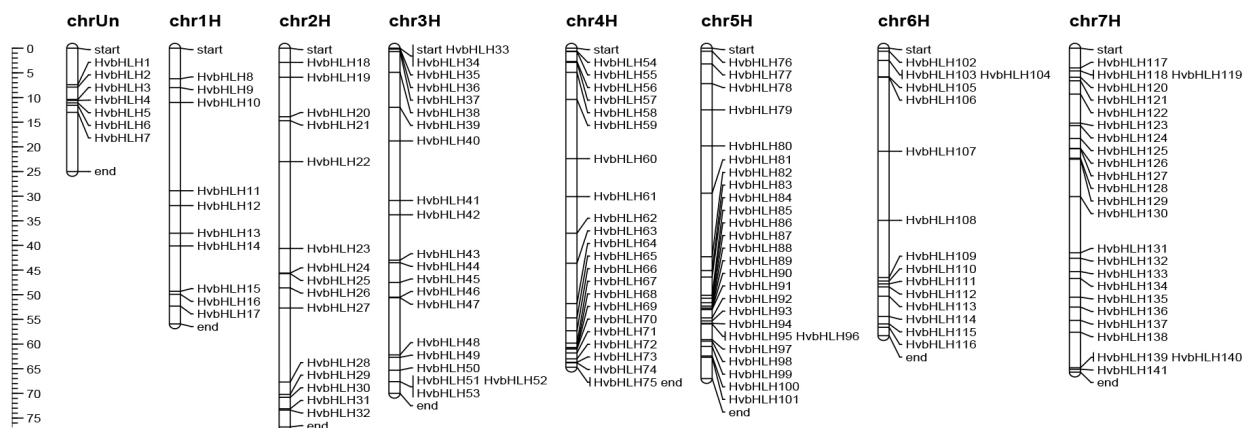

**Fig. S1.** Chromosomal localizations of *HvbHLHs*.

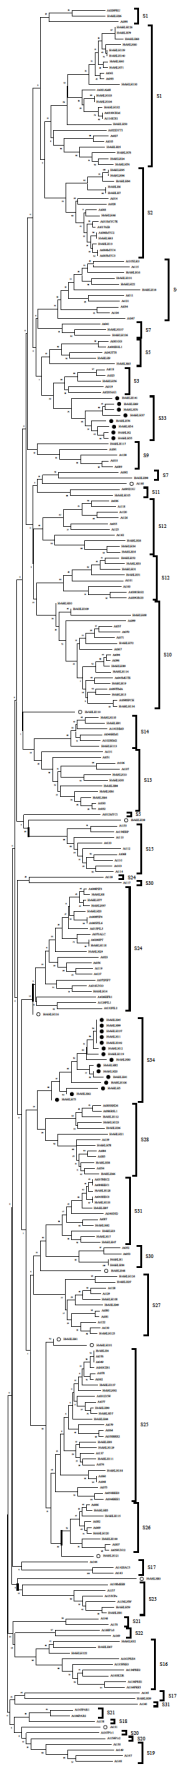

**Fig. S2.** Phylogenetic tree of bHLHs in barley and *Arabidopsis*.

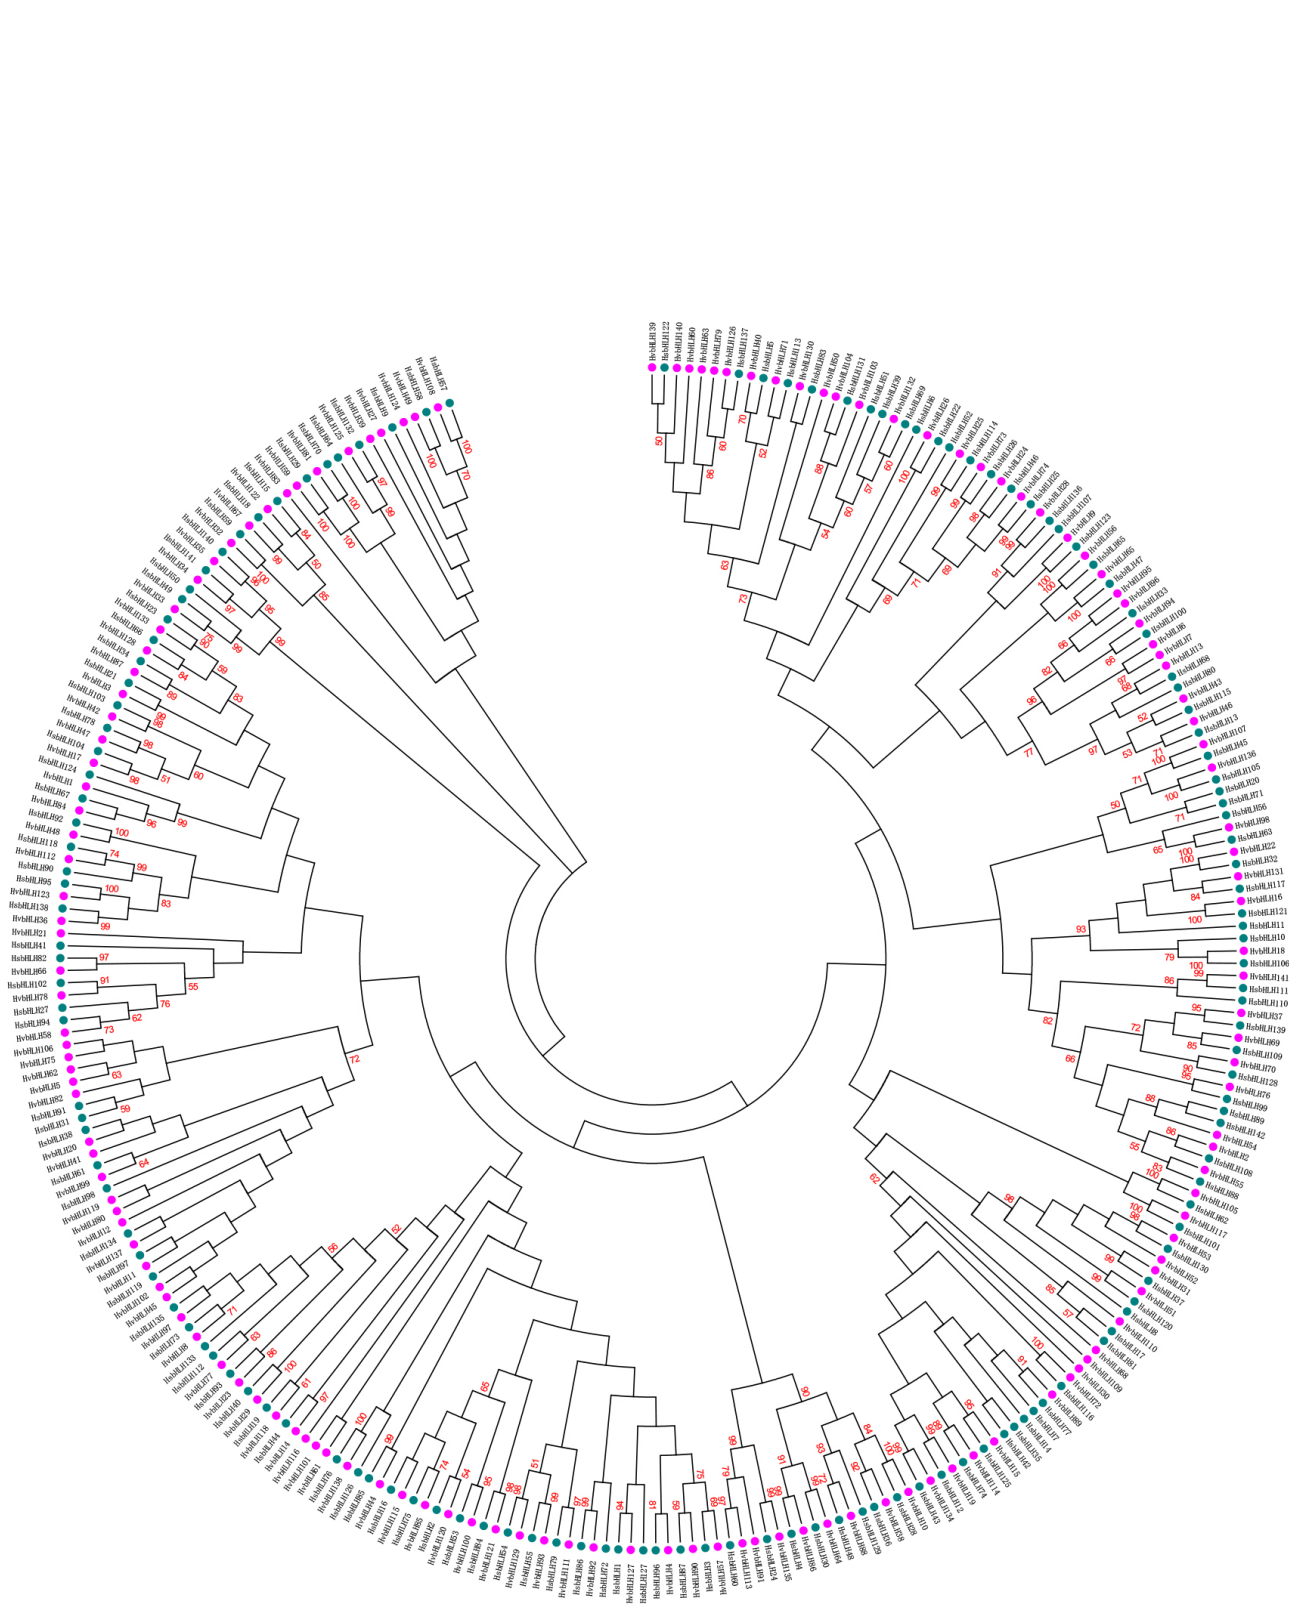

Fig. S3. Phylogenetic of bHLHs in wild and cultivated barley.
